# Supplementary material for: The nano-scale molecule with the longest delocalized metal–metal bonds: linear heptacobalt(ii) metal string complexes [Co7(µ7-L)4X2]
Source: Royal Society of Chemistry journal article supplement (doi:10.1039/b614661a), 2007-01-01
Supplement: b614661a.pdf [file b614661a.pdf]

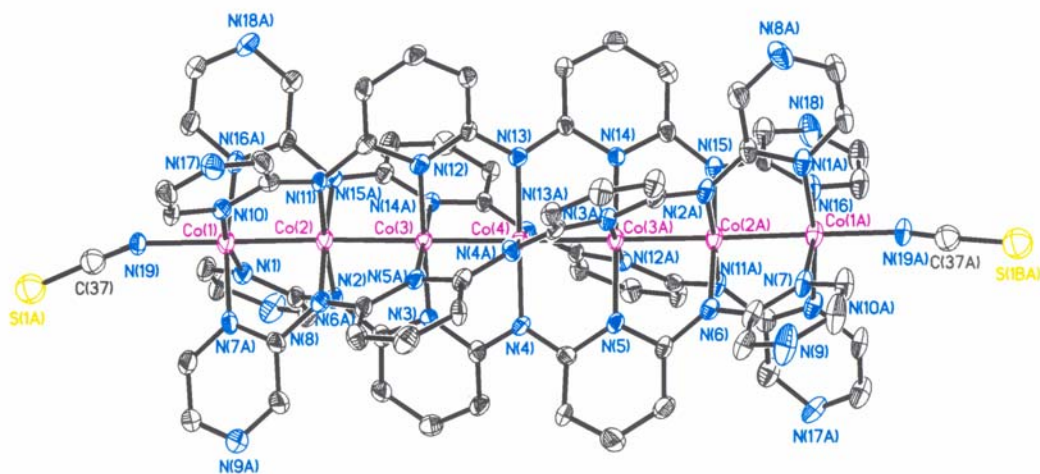

**Fig. 1S** The crystal structure of  $[\text{Co}_7(\mu_7\text{-pzpz})_4(\text{NCS})_2]$  (**4**). Atoms are drawn at the 50% probability level. Disordered atomic positions and hydrogen atoms are omitted for clarity. Label A was generated through the symmetric options  $-1-x, y$  and  $1/2-z$ .

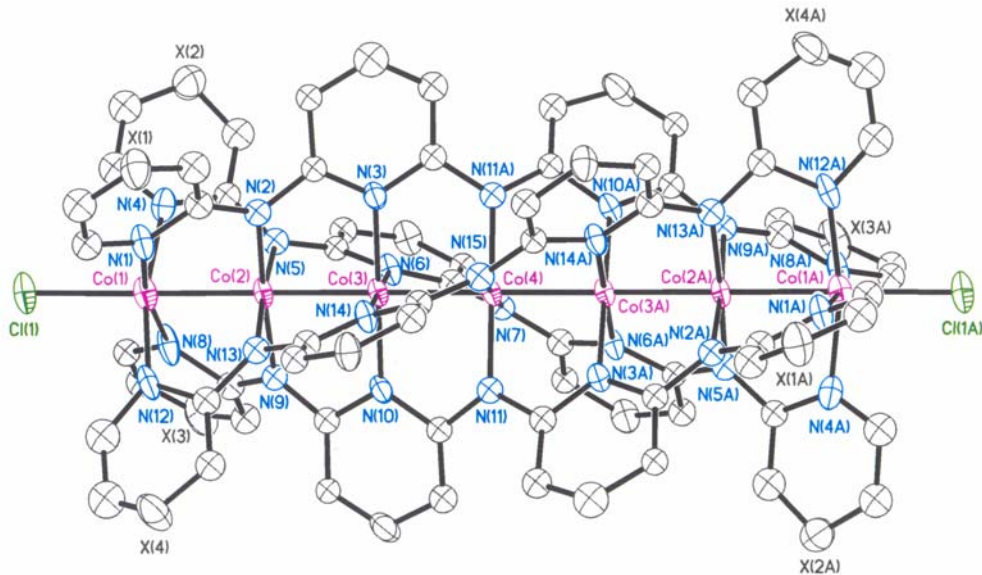

**Fig. 2S** The crystal structure of  $[\text{Co}_7(\mu_7\text{-tpz})_4\text{Cl}_2]$  (**5**). Atoms are drawn at the 50% probability level. Disordered atomic positions and hydrogen atoms are omitted for clarity. Label A was generated through the symmetric options  $-x, y$  and  $1/2-z$ .
